# Supplementary material
Source: publisher figshare collection journal article supplement (https://acs.figshare.com/ndownloader/files/12823805)
Supplement: Supplementary file 1 [file 12823805]

## Supporting Information for

# **“Identifying and Modulating Accidental Fermi Resonance: 2D IR and DFT Study of 4-Azido-L-Phenylalanine”**

Jia Zhang<sup>1,4,#</sup>, Li Wang<sup>2,6,#</sup>, Jin Zhang<sup>1,4</sup>, Jiangrui Zhu<sup>1,4</sup>, Xin Pan<sup>1,5</sup>, Zhifeng Cui<sup>5</sup>,  
Jiangyun Wang<sup>2,\*</sup>, Weihai Fang<sup>3,\*</sup>, Yunliang Li<sup>1,4,\*</sup>

<sup>1</sup>*Beijing National Laboratory for Condensed Matter Physics and CAS Key Laboratory*

*of Soft Matter Physics, Institute of Physics, Chinese Academy of Sciences, Beijing*

*100190, People’s Republic of China*

<sup>2</sup>*Laboratory of RNA Biology, Institute of Biophysics, Chinese Academy of Sciences,*

*Beijing 100101, People’s Republic of China*

<sup>3</sup>*College of Chemistry, Beijing Normal University, Beijing 100875, People’s Republic*

*of China*

<sup>4</sup>*School of Physical Sciences, University of Chinese Academy of Sciences, Beijing*

*100049, People’s Republic of China*

<sup>5</sup>*College of Physics and Electric Information, Anhui Normal University, Wuhu*

*241000, People’s Republic of China*

<sup>6</sup>*College of Life Sciences, University of Chinese Academy of Sciences, Beijing*

*100049, People’s Republic of China*

## 1. Calculated IR Spectra of pN<sub>3</sub>Phe

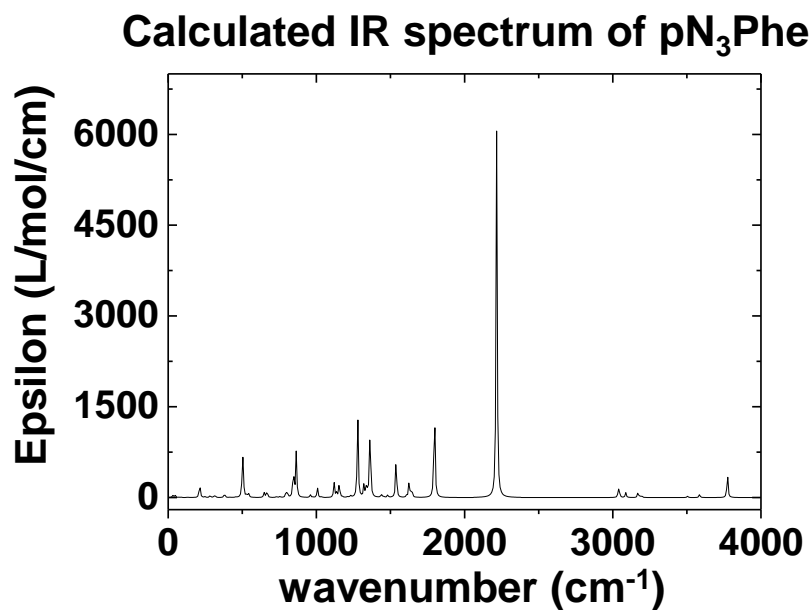

**Figure S1.** Calculated IR spectrum of pN<sub>3</sub>Phe in isopropanol using B3LYP/6-311++G(df, pd) basis in Gaussian.

Figure S1 shows the calculated IR spectrum (harmonic frequency) of pN<sub>3</sub>Phe in isopropanol using B3LYP/6-311++G(df, pd) basis in Gaussian. Only one vibration peak is found in the window of azide asymmetric stretching vibration (2000 cm<sup>-1</sup>-2300 cm<sup>-1</sup>).

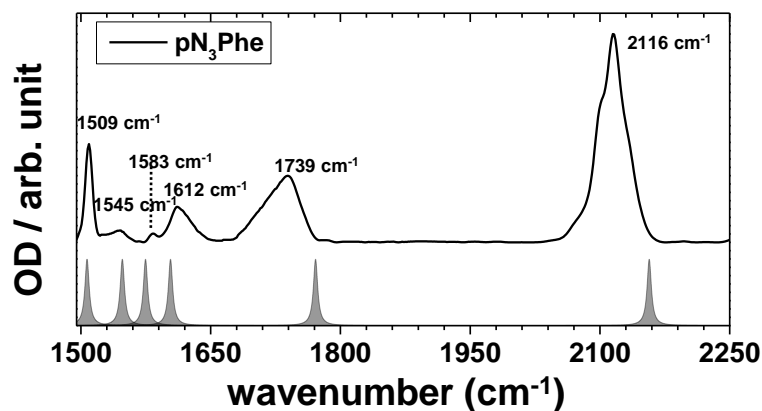

**Figure S2.** FTIR spectrum of pN<sub>3</sub>Phe in isopropanol (black line). The calculated bands are plotted with Lorentzian distribution function centered at the anharmonic frequencies of corresponding normal modes with a FWHM of 6 cm<sup>-1</sup> (gray peaks). The intensities of calculated bands are normalized.

Figure S2 shows the FTIR spectrum of pN<sub>3</sub>Phe in isopropanol and the calculated anharmonic frequencies of corresponding bands. Because of the influence of solvent, we only plot the region from 1495 cm<sup>-1</sup> to 2250 cm<sup>-1</sup>. The absorption of solvent is subtracted from the spectrum. The spectrum is baseline corrected and smoothed. The calculated bands are normalized and plotted with Lorentzian distribution function centered at the anharmonic frequencies of corresponding normal modes with a FWHM of 6 cm<sup>-1</sup>.

**Table S1. Normal Modes of pN<sub>3</sub>Phe in Isopropanol**

| assignment                                        | $\nu$ (harm) | $\nu$ (anharm) |
|---------------------------------------------------|--------------|----------------|
| N <sub>3</sub> asymmetric stretch                 | 2116         | 2157           |
| carbonyl stretch                                  | 1739         | 1771           |
| Kekulé ring vibration (four H-substitute C atoms) | 1612         | 1604           |
| Kekulé ring vibration (the other two C atoms)     | 1583         | 1575           |
| Amide II vibration of the carbamate               | 1545         | 1548           |
| ring CCC bend                                     | 1509         | 1507           |

## 2. Mulliken Charge Distribution

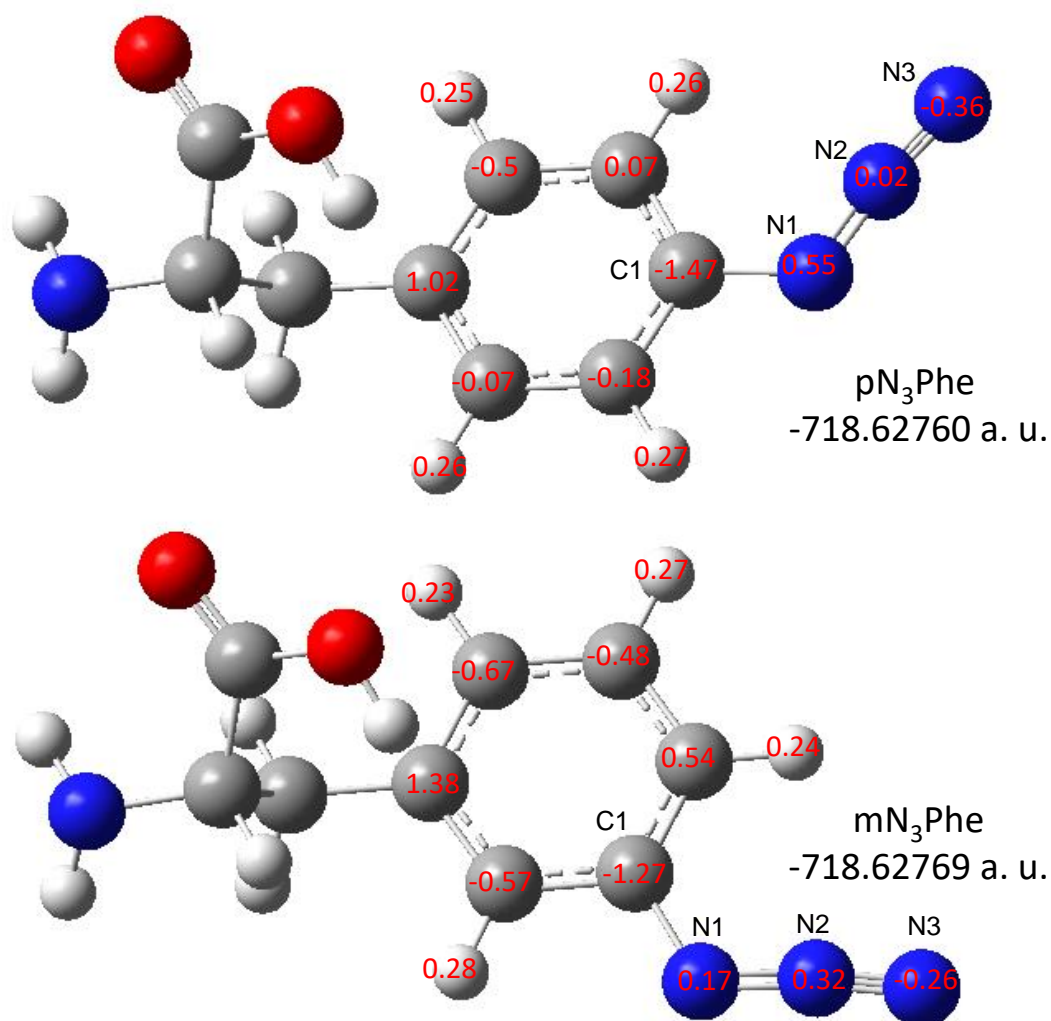

**Figure S3.** Mulliken charge distributions and relative energies of pN<sub>3</sub>Phe and mN<sub>3</sub>Phe calculated by Gaussian 09.

### 3. Anharmonic Frequency Calculations

**Table S2. Calculated Anharmonic Frequencies and Cubic Force Constants of pN<sub>3</sub>Phe in H<sub>2</sub>O**

| mode  | $\nu$ (cm <sup>-1</sup> ) | $K_{ijk}$<br>(cm <sup>-1</sup> ) | mode  | $\nu$ (cm <sup>-1</sup> ) | $K_{ijk}$<br>(cm <sup>-1</sup> ) |
|-------|---------------------------|----------------------------------|-------|---------------------------|----------------------------------|
| 11    | 2171.2                    |                                  |       |                           |                                  |
| 40 20 | 2168.3                    | 13.2                             | 44 19 | 2177.6                    | -1.0                             |
| 40 21 | 2171.2                    | -13.0                            | 46 16 | 2179.1                    | -2.1                             |
| 41 21 | 2151.5                    | 22.1                             | 47 16 | 2161.7                    | -4.7                             |
| 42 21 | 2147.4                    | 11.5                             | 63 11 | 2172.4                    | 4.2                              |

**Table S3. Normal Modes Involved in FRs of mN<sub>3</sub>Phe in Isopropanol**

| mode | assignment                                                                | $\nu$ (harm) | $\nu$ (anharm) |
|------|---------------------------------------------------------------------------|--------------|----------------|
| 11   | N <sub>3</sub> asymmetric stretch                                         | 2217.8       | 2166.4         |
| 16   | ring breath + N <sub>3</sub> bending                                      | 1517.7       | 1481.2         |
| 20   | N <sub>3</sub> symmetric stretch + C–N stretch +<br>Kekulé ring vibration | 1361.5       | 1314.3         |
| 41   | ring breath + N–H swing + C–H out of<br>plane                             | 857.8        | 875.2          |
| 47   | Kekulé ring vibration + N <sub>3</sub> bending                            | 687.6        | 678.9          |

#### 4. Comparison of calculated IR spectra of pN<sub>3</sub>Phe, pN<sup>15</sup>NNPhe, mN<sub>3</sub>Phe

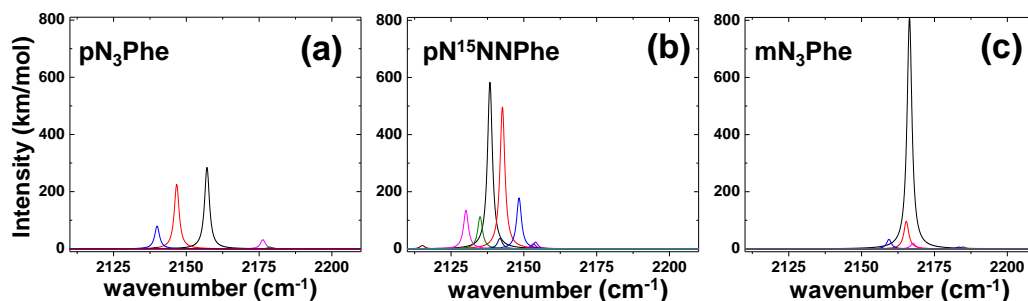

Figure S4. Calculated spectra of (a) pN<sub>3</sub>Phe (b) pN<sup>15</sup>NNPhe (c) mN<sub>3</sub>Phe in azide asymmetric stretch region. The overtone or combination bands (colored) that located within 25 cm<sup>-1</sup> of the azide asymmetric stretching vibration with intensity larger than 1 km/mol and azide asymmetric stretching band (black) are plotted. The calculated lineshape is convoluted with a Lorentzian function with FWHM of 2 cm<sup>-1</sup>.

Figure S4 shows the calculated spectra of (a) pN<sub>3</sub>Phe (b) pN<sup>15</sup>NNPhe (c) mN<sub>3</sub>Phe in azide asymmetric stretch region. The overtone and combination bands that located within 25 cm<sup>-1</sup> of the azide asymmetric stretching vibration with intensity larger than 1 km/mol and azide asymmetric stretching band are plotted. The calculated lineshape is convoluted with a Lorentzian function with FWHM of 2 cm<sup>-1</sup>.

It should be noted that first-principles calculations using Gaussian 09 give inaccurate intensity results of anharmonic modes in the presences of Fermi resonances because it was missing ad hoc equations to treat all cases of resonances in intensity equations and variational correction to the transition moments. The spectra only supply the frequency distribution as a reference.
